# Supplementary material for: Day versus night and the evolution of sexual dimorphism in Lepidoptera
Source: Research Square preprint supplement (doi:10.21203/rs.3.rs-7603116/v1), 2025-11-04
Supplement: Supplementary file 1 [file 1eec89d17666177644f7b404.docx]

**Supplementary data table. 1**: Description of trait metrics created and used

**Supplementary data table 2:** Emmeans slope significance testing output for butterflies and nocturnal moths average rate, dimorphism, sexual bias linear model analysis

**Supplementary data table 3:** Calibration points and references for timetree calibration of Geometridae phylogeny

**Supplementary data file 1:** Time calibrated Geometridae phylogeny in Newick format. Species names are ordered tip numbers matching the original phylogeny in Murillo-Ramos *et al.* (2019)

**Supplementary data file 2:** Catalog numbers and metadata of butterfly and moth specimens used in this study.

**Supplementary data file 3**: Overall and singleband sexual selection indicator analysis for butterflies excluding three night-flying Hedylidae species

**Supplementary data file 4**: Determinations and justifications for Geometridae diurnal behavior activity pattern categorizations.

**Supplementary Table 1**

| **Class** | **Generalized trait structure** | **Example trait** | **Reflectance threshold** | **Wavelength band(s)** | **Description** | **# traits** |
| --- | --- | --- | --- | --- | --- | --- |
| Color distribution | [Primary/Secondary/Tertiary]_color_[8bit/3bit]_prop_[wavelength bands] | Primary_color_8bit_prop_UV_940 | None | UV-940, UV-740, UV-R, B-R, 940 | First, second or third most frequent multispectral color patch size, proportionate. Color palettes made by remapping pixels in each wavelength band into either 8 or 3 intensity classes (plus zero). Summarized across 6 wavelength band combinations | 30 |
| MDI_[8bit/3bit]_[wavelength bands] | MDI_8bit_UV_940 | None | UV-940, UV-740, UV-R, B-R, 940 | The Moment-Distance index of the wing color-frequency histogram. Mathematical characterization of the shape of the wing color-frequency distribution. Calculated with either 8 or 3 intensity classes as above. | 10 |
| Color_richness_[8bit/3bit]_[wavelength bands] | Color_richness_8bit_UV_940 | None | UV-940, UV-740, UV-R, B-R, 940 | Number of unique wing multispectral colors. Calculated with either 8 or 3 intensity classes as above. | 10 |
| Norm_perchannel_Color_richness_[8bit/3bit]_[wavelength bands] | Norm_perchannel_Color_richness_8bit_UV_940 | None | UV-940, UV-740, UV-R, B-R, 940 | The color richness per wavelength band that would yield the observed multispectral color richness (above) if evenly distributed across wavelength bands (a means of comparing richness across different numbers of wavelength band combinations). Calculated via: richness^(1/number of wavelength bands). Either 8 or 3 intensity classes as above. | 10 |
| SW_entropy_[8bit/3bit]_[wavelength bands] | SW_entropy_8bit_UV_940 | None | UV-940, UV-740, UV-R, B-R, 940 | Shannon-Weaver index of color diversity or entropy (Shannon and Weaver, 1949). Either 8 or 3 intensity classes as above. | 10 |
| Perchannel_effective_num_colors_[8bit/3bit]_[wavelength bands] | Perchannel_effective_num_colors_8bit_UV_940 | None | UV-940, UV-740, UV-R, B-R, 940 | Shannon effective number of colors: the number of evenly distributed colors in each channel that yield the observed Shannon-Weaver (SW) value. Calculated via: (e^SW)^(1/number of wavelength bands) Either 8 or 3 intensity classes as above. | 10 |
| Norm_actual_to_effective_colors_[8bit/3bit]_[wavelength bands] | Norm_actual_to_effective_colors_8bit_UV_940 | None | UV-940, UV-740, UV-R, B-R, 940 | Ratio of norm_perchannel_color_richness and perchannel_effective_num_color values above. Measures deviation of observed per channel color richness from evenly spectrally distributed color evenness. Either 8 or 3 intensity classes as above. | 10 |
| SW_evenness_[8bit/3bit]_[wavelength bands] | SW_evenness_8bit_UV_940 | None | UV-940, UV-740, UV-R, B-R, 940 | Shannon-Weaver (Pielou's) multispectral color evenness index: SW-entropy/ln(#colors). Either 8 or 3 intensity classes as above. | 10 |
| Color_contrast [8bit/3bit]_[wavelength bands] | Color_contrast_8bit_UV_940 | None | UV-940, UV-740, UV-R, B-R, 940 | Overall multispectral color contrast (total Euclidean distance) between the colors of all wing pixels and the overall wing color centroid (calculated as the mean of all pixel values in each wavelength band). Defined here by the square root of the squared deviations of each pixel from the color centroid. Either 8 or 3 intensity classes as above. | 10 |
| Col_richness_[8bit/3bit][wavelength bands]_SC | Col_richness_8bitUV940_SC | None | UV-940, UV-740, UV-R, B-R, 940 | Color richness as above, divided by the specimen wing area and multiplied by the average wing area across all specimens | 10 |
| Col_contrast_[8bit/3bit][wavelength bands]_SC | Col_contrast_8bitUV940_SC | None | UV-940, UV-740, UV-R, B-R, 940 | Color contrast as above, divided by the specimen wing area and multiplied by the average wing area across all specimens | 10 |
| Norm_perchannel_Col_richness_[8bit/3bit][wavelength bands]_SC | Norm_perchannel_Col_richness_8bitUV940_SC | None | UV-940, UV-740, UV-R, B-R, 940 | Color contrast as above, divided by the specimen wing area and multiplied by the average wing area across all specimens | 10 |
| Complexity | [wavelength band(s)]_png | globalPCs_png | None | UV,B,G,R,740,940,B-R,UV-R,740-940,UV-940 (global), UV-940 (local) | The Kolmogorov complexity of each wing, calculated as the ratio of the png compressed image size to the uncompressed image size | 11 |
| Size | Area_Mask_cm2 | Area_Mask_cm2 | None |  | Wing size | 1 |
| Reflectance | [1%/5%/10%/20% Patch_reflectance_threshold]_[wavelength band]_refl_cm2 | 1_UV_refl_cm2 | 1%,5%,10%,20% | UV,B,G,R,740,940 | Reflectance (albedo: 0-1) per cm^2 of pixels above the given threshold (1%/5%/10%/20% reflectance) | 24 |
| [1%/5%/10%/20% Patch_reflectance_threshold]_[wavelength band]_refl_CV | 1_UV_refl_CV | 1%,5%,10%,20% | UV,B,G,R,740,940 | Reflectance (albedo: 0-1) coefficient of variation of pixels above the given threshold (1%/5%/10%/20% reflectance) | 24 |
| [1%/5%/10%/20% Patch_reflectance_threshold]_Area_[wavelength band]_pct | 1_Area_UV_pct | 1%,5%,10%,20% | UV,B,G,R,740,940 | Area (cm^2) of pixels above the given threshold (1%/5%/10%/20% reflectance) | 24 |
| [1%/5%/10%/20% Patch_reflectance_threshold]_avg_reflectance_[wavelength bands] | 1_avg_reflectance_UV940 | 1%,5%,10%,20% | UV-940, UV-740, UV-R, B-R | Average reflectance (albedo: 0-1) per cm^2 of pixels above the given threshold (1%/5%/10%/20% reflectance) across given combinations of wavelength bands | 16 |
|  |  |  |  |  | **Total** | **240** |

**Supplementary Table 2**

| **Dataset** | **Trend** | **SE** | **df** | **lower.CL** | **upper.CL** | **Categorical_variable** | **Model_name** | **Dependent_variable** | **Independent_variable** | **CI_method** | **Significance** |
| --- | --- | --- | --- | --- | --- | --- | --- | --- | --- | --- | --- |
| DFW | 0.058056 | 0.008024 | 655.9012 | 0.042301 | 0.073811 | All | butterfly_model4 | log10(Avg_Abs_rate_med) | sec_mom_var_med | Kenward-Roger | Positive |
| DHW | 0.035796 | 0.008846 | 662.539 | 0.018427 | 0.053166 | All | butterfly_model4 | log10(Avg_Abs_rate_med) | sec_mom_var_med | Kenward-Roger | Positive |
| VFW | 0.060824 | 0.007777 | 675.4919 | 0.045555 | 0.076094 | All | butterfly_model4 | log10(Avg_Abs_rate_med) | sec_mom_var_med | Kenward-Roger | Positive |
| VHW | 0.039843 | 0.007482 | 662.1187 | 0.025153 | 0.054534 | All | butterfly_model4 | log10(Avg_Abs_rate_med) | sec_mom_var_med | Kenward-Roger | Positive |
| DFW | 0.24203 | 0.103474 | 566.5494 | 0.03879 | 0.44527 | All | butterfly_model5 | log10(Avg_Abs_rate_med) | Abs_rate_prop_sexbias_med | Kenward-Roger | Positive |
| DHW | 0.062418 | 0.113445 | 566.4686 | -0.16041 | 0.285243 | All | butterfly_model5 | log10(Avg_Abs_rate_med) | Abs_rate_prop_sexbias_med | Kenward-Roger | None |
| VFW | -0.01355 | 0.113857 | 566.3132 | -0.23718 | 0.210083 | All | butterfly_model5 | log10(Avg_Abs_rate_med) | Abs_rate_prop_sexbias_med | Kenward-Roger | None |
| VHW | -0.23458 | 0.108919 | 566.394 | -0.44851 | -0.02064 | All | butterfly_model5 | log10(Avg_Abs_rate_med) | Abs_rate_prop_sexbias_med | Kenward-Roger | Negative |
| DFW | 0.13495 | 0.051794 | 566.805 | 0.033218 | 0.236682 | All | butterfly_model5 | log10(Avg_Abs_rate_med) | Extant_var_MD_prop_sexbias_prop | Kenward-Roger | Positive |
| DHW | 0.038183 | 0.058237 | 567.0421 | -0.0762 | 0.15257 | All | butterfly_model5 | log10(Avg_Abs_rate_med) | Extant_var_MD_prop_sexbias_prop | Kenward-Roger | None |
| VFW | -0.0483 | 0.064034 | 566.6249 | -0.17407 | 0.077471 | All | butterfly_model5 | log10(Avg_Abs_rate_med) | Extant_var_MD_prop_sexbias_prop | Kenward-Roger | None |
| VHW | -0.13714 | 0.057717 | 566.4766 | -0.25051 | -0.02378 | All | butterfly_model5 | log10(Avg_Abs_rate_med) | Extant_var_MD_prop_sexbias_prop | Kenward-Roger | Negative |
| DFW | 0.027294 | 0.010217 | 635.7509 | 0.00723 | 0.047357 | All | moth_model4 | log10(Avg_Abs_rate_med) | sec_mom_var_med | Kenward-Roger | Positive |
| DHW | 0.024699 | 0.009729 | 636.1185 | 0.005595 | 0.043803 | All | moth_model4 | log10(Avg_Abs_rate_med) | sec_mom_var_med | Kenward-Roger | Positive |
| VFW | 0.064464 | 0.010141 | 635.0696 | 0.04455 | 0.084377 | All | moth_model4 | log10(Avg_Abs_rate_med) | sec_mom_var_med | Kenward-Roger | Positive |
| VHW | 0.043637 | 0.009419 | 635.2568 | 0.025142 | 0.062133 | All | moth_model4 | log10(Avg_Abs_rate_med) | sec_mom_var_med | Kenward-Roger | Positive |
| DFW | 0.042201 | 0.080048 | 625.3384 | -0.11499 | 0.199395 | All | moth_model5 | log10(Avg_Abs_rate_med) | Abs_rate_prop_sexbias_med | Kenward-Roger | None |
| DHW | 0.105131 | 0.082326 | 625.176 | -0.05654 | 0.2668 | All | moth_model5 | log10(Avg_Abs_rate_med) | Abs_rate_prop_sexbias_med | Kenward-Roger | None |
| VFW | -0.18347 | 0.07712 | 625.5998 | -0.33492 | -0.03203 | All | moth_model5 | log10(Avg_Abs_rate_med) | Abs_rate_prop_sexbias_med | Kenward-Roger | Negative |
| VHW | -0.09871 | 0.085864 | 625.4443 | -0.26732 | 0.069906 | All | moth_model5 | log10(Avg_Abs_rate_med) | Abs_rate_prop_sexbias_med | Kenward-Roger | None |
| DFW | 0.074772 | 0.064213 | 625.262 | -0.05133 | 0.200871 | All | moth_model6 | log10(Avg_Abs_rate_med) | Extant_var_MD_prop_sexbias_prop | Kenward-Roger | None |
| DHW | 0.060501 | 0.05686 | 625.4278 | -0.05116 | 0.172162 | All | moth_model6 | log10(Avg_Abs_rate_med) | Extant_var_MD_prop_sexbias_prop | Kenward-Roger | None |
| VFW | -0.05299 | 0.057143 | 625.5283 | -0.1652 | 0.059225 | All | moth_model6 | log10(Avg_Abs_rate_med) | Extant_var_MD_prop_sexbias_prop | Kenward-Roger | None |
| VHW | -0.07698 | 0.058823 | 625.5642 | -0.1925 | 0.038531 | All | moth_model6 | log10(Avg_Abs_rate_med) | Extant_var_MD_prop_sexbias_prop | Kenward-Roger | None |
| DFW | 1.0213 | 0.234761 | 643.2175 | 0.56031 | 1.48229 | All | butterfly_model | log10(sec_mom_var_med) | Abs_rate_prop_sexbias_med | Kenward-Roger | Positive |
| DHW | 0.562207 | 0.259855 | 642.4456 | 0.05194 | 1.072475 | All | butterfly_model | log10(sec_mom_var_med) | Abs_rate_prop_sexbias_med | Kenward-Roger | Positive |
| VFW | 0.486384 | 0.26848 | 639.5568 | -0.04082 | 1.013592 | All | butterfly_model | log10(sec_mom_var_med) | Abs_rate_prop_sexbias_med | Kenward-Roger | None |
| VHW | -0.44164 | 0.257063 | 641.4443 | -0.94643 | 0.063148 | All | butterfly_model | log10(sec_mom_var_med) | Abs_rate_prop_sexbias_med | Kenward-Roger | None |
| DFW | 0.785502 | 0.11567 | 637.4648 | 0.558362 | 1.012642 | All | butterfly_model2 | log10(sec_mom_var_med) | Extant_var_MD_prop_sexbias_prop | Kenward-Roger | Positive |
| DHW | 0.706383 | 0.127242 | 640.0815 | 0.456522 | 0.956245 | All | butterfly_model2 | log10(sec_mom_var_med) | Extant_var_MD_prop_sexbias_prop | Kenward-Roger | Positive |
| VFW | 0.277077 | 0.148743 | 634.5917 | -0.01501 | 0.569166 | All | butterfly_model2 | log10(sec_mom_var_med) | Extant_var_MD_prop_sexbias_prop | Kenward-Roger | None |
| VHW | -0.24135 | 0.138366 | 633.5347 | -0.51306 | 0.030365 | All | butterfly_model2 | log10(sec_mom_var_med) | Extant_var_MD_prop_sexbias_prop | Kenward-Roger | None |
| DFW | 0.002594 | 0.131114 | 788.7254 | -0.25478 | 0.259968 | All | moth_model | log10(sec_mom_var_med) | Abs_rate_prop_sexbias_med | Kenward-Roger | None |
| DHW | -0.00689 | 0.12954 | 787.8647 | -0.26117 | 0.247395 | All | moth_model | log10(sec_mom_var_med) | Abs_rate_prop_sexbias_med | Kenward-Roger | None |
| VFW | -0.1069 | 0.122618 | 789.9032 | -0.3476 | 0.133796 | All | moth_model | log10(sec_mom_var_med) | Abs_rate_prop_sexbias_med | Kenward-Roger | None |
| VHW | -0.24651 | 0.135339 | 786.5564 | -0.51218 | 0.019153 | All | moth_model | log10(sec_mom_var_med) | Abs_rate_prop_sexbias_med | Kenward-Roger | None |
| DFW | -0.06928 | 0.098548 | 781.7676 | -0.26273 | 0.124175 | All | moth_model2 | log10(sec_mom_var_med) | Extant_var_MD_prop_sexbias_prop | Kenward-Roger | None |
| DHW | -0.0173 | 0.088959 | 780.8109 | -0.19193 | 0.157326 | All | moth_model2 | log10(sec_mom_var_med) | Extant_var_MD_prop_sexbias_prop | Kenward-Roger | None |
| VFW | -0.2561 | 0.074893 | 780.9462 | -0.40311 | -0.10908 | All | moth_model2 | log10(sec_mom_var_med) | Extant_var_MD_prop_sexbias_prop | Kenward-Roger | Negative |
| VHW | -0.31431 | 0.083418 | 784.3642 | -0.47806 | -0.15056 | All | moth_model2 | log10(sec_mom_var_med) | Extant_var_MD_prop_sexbias_prop | Kenward-Roger | Negative |

**Supplementary Table 3**

| **Calibration check** | **Taxa 1** | **Geom ID** | **Taxa 2** | **Geom ID2** | **Estimate** | **Min** | **Max** | **Num studies** | **Estimate source** | **Node from Murillos Ramos 2019** |
| --- | --- | --- | --- | --- | --- | --- | --- | --- | --- | --- |
| Calibration | Root |  | Root |  | 82.6 | 72.3 | 93.1 | 1 | Kawahara et al . 2019 | 1207 |
| Calibration | Mania | 2 | Epicopeia | 5 | 71.5 | 58.387 | 84.613 | 1 | Kawahara et al . 2019 | 1209 |
| Calibration | Macaria | 933 | Idaea | 59 | 54 | 53 | 66.3 | 5 | Timetree | 1221 |
| Calibration | Aracima | 397 | Melinodes | 762 | 53 | 45.7 | 55.1 | 3 | Timetree | 1574 |
| Calibration | Alsophila | 782 | Archiearis | 344 | 49.65 | 45.1055 | 55.7945 | 2 | Wahlberg et al 2010, Yamamoto et al. 2007 | 1548 |
| Calibration | Biston | 1135 | Macaria | 933 | 38 | 32.9 | 45.1 | 4 | Timetree | 2097 |
| Calibration | Ennomos alniaria | 683 | Eutomopepla nr rogenhoferi | 718 | 43.436 | 29.346 | 57.526 | 1 | Murillo-Ramos 2021- Boarmiini | 1887 |
| Calibration | Tanaorhinus kina | 411 | Nemoria nr erina | 449 | 34.739 | 23.621 | 45.857 | 1 | Murillo-Ramos 2021- Boarmiini | 1613 |
| Calibration | Alsophila | 782 | Colotois | 785 | 25.25 | 19.43325 | 31.06675 | 2 | Wahlberg et al 2010, Yamamoto et al. 2007 | 1990 |
| Calibration | Erannis | 1131 | Biston | 1135 | 20.1 | 16.056 | 24.144 | 1 | Wahlberg et al 2010 | 2338 |
| Calibration | Erannis | 1131 | Alcis | 1107 | 21.1 | 15.7385 | 26.4615 | 1 | Yamamoto et al 2007 | 2286 |
| Calibration | Epirrita | 196 | Operophtera | 198 | 14.95 | 10.48925 | 19.41075 | 2 | Wahlberg et al 2010, Yamamoto et al. 2007 | 1405 |
| Calibration | Arichanna | 1041 | Bupalus | 1040 | 12.4 | 9.37 | 15.43 | 1 | Wahlberg et al 2010 | 2248 |
| Calibration | Geometra papilionaria | 419 | Tanaorhinus kina | 411 | 16.7801 | 9.2851 | 24.2751 | 1 | Murillo-Ramos 2021- Boarmiini | 1620 |
| Calibration | Oedicentra gerydaria | 574 | Oedicentra albipennis | 575 | 12.8351 | 6.6826 | 18.9876 | 1 | Murillo-Ramos 2021- Boarmiini | 1784 |
| Calibration | Luxiaria mitorrhaphes | 918 | Luxiaria rescripta | 919 | 10.1299 | 5.6729 | 14.5869 | 1 | Murillo-Ramos 2021- Boarmiini | 2126 |
| Calibration | Geolyces nr contenta | 1204 | Geolyces pennumbrata | 1205 | 6.2117 | 3.2932 | 9.1302 | 1 | Murillo-Ramos 2021- Boarmiini | 2410 |
| Calibration | Stenoporpia nr pulmonaria | 972 | Stenoporpia excelsaria | 973 | 4.1617 | 1.6717 | 6.6517 | 1 | Murillo-Ramos 2021- Boarmiini | 2179 |
| Check | Charissa obscurata | 566 | Kemptrognophos ambiguata | 567 | 15.5634 | 8.4664 | 22.6604 | 1 | Murillo-Ramos 2021- Boarmiini | 1776 |
| Check | Lycia lapponaria | 1186 | Lycia pomonaria | 1187 | 1.4495 | 0.6045 | 2.2945 | 1 | Murillo-Ramos 2021- Boarmiini | 2393 |
| Check | Dyspteris | 94 | Perizoma | 152 | 51 |  |  |  | Timetree |  |

Submitted as “source files” during initial submission due to PDF format incompatibility:

**Supplementary data file 1:** Time calibrated Geometridae phylogeny in Newick format. Species names are ordered tip numbers matching the original phylogeny in Murillo-Ramos *et al.* (2019)

**Supplementary data file 2:** Catalog numbers and metadata of butterfly and moth specimens used in this study.

**Supplementary data file 3**: Overall and singleband sexual selection indicator analysis for butterflies excluding three night-flying Hedylidae species

**Supplementary data file 4**: Determinations and justifications for Geometridae diurnal behavior activity pattern categorizations.
