# Supplementary material for: Day versus night and the evolution of sexual dimorphism in Lepidoptera
Source: Research Square preprint supplement (doi:10.21203/rs.3.rs-7603116/v1), 2025-11-04
Supplement: Supplementary file 2 [file 48bc3a2364deb6b368e111c0.docx]

**Supplementary data table. 1**: Description of trait metrics created and used

**Supplementary data table 2:** Emmeans slope significance testing output for butterflies and nocturnal moths average rate, dimorphism, sexual bias linear model analysis

**Supplementary data table 3:** Calibration points and references for timetree calibration of Geometridae phylogeny

**Supplementary data file 1:** Time calibrated Geometridae phylogeny in Newick format. Species names are ordered tip numbers matching the original phylogeny in Murillo-Ramos *et al.* (2019)

**Supplementary data file 2:** Catalog numbers and metadata of butterfly and moth specimens used in this study.

**Supplementary data file 3**: Overall and singleband sexual selection indicator analysis for butterflies excluding three night-flying Hedylidae species

**Supplementary data file 4**: Determinations and justifications for Geometridae diurnal behavior activity pattern categorizations.
